# Supplementary material for: Molecular Techniques and Target Selection for the Identification of Candida spp. in Oral Samples
Source: MDPI journal article supplement (doi:10.3390/app12189204), 2022-09-14
Supplement: s1 [file s1]

**Table S1** – Primers (Universal and species-specific) used for *Candida* species detection and size of fragments separated by agarose gel electrophoresis [57,75,77,78,80,166].

| Species                | Target    | Primer sequences (F: forward; R: reverse)    | Amplicon size (bp)      | Annealing temperature (°C) |
|------------------------|-----------|----------------------------------------------|-------------------------|----------------------------|
| <i>C. albicans</i>     | ITS       | ITS1F: 5' – TCAACTTGTCACACCAGATTATT – 3'     | 632 <sup>[77]</sup>     | 45-55                      |
|                        |           | ITS4R: 5' – TCCTCCGCTTATTGATATGC – 3'        |                         |                            |
|                        |           | CALF: 5' – AGCTGCCGCCAGAGGTCTAA – 3'         | 583/446 <sup>[78]</sup> | 55                         |
|                        |           | UNI2R: 5' – TTCTTTTCCTCCGCTTATTG – 3'        |                         |                            |
|                        | MP65 gene | CA64F: 5' – AACGGATCCATGTTATTCAAGTCTTTC – 3' | 1144 <sup>[57]</sup>    | 60                         |
|                        |           | CA64R: 5' – GGGCTGCAGGTGCTTAGTTAGAGTAA – 3'  |                         |                            |
|                        |           | CABISF: 5' – ATGTTATTCAAGTCTTTCGTTACT – 3'   | 467 <sup>[57]</sup>     | 60                         |
|                        |           | CABISR: 5' – TGACATTAAATCCAGATAATTGAGC – 3'  |                         |                            |
|                        | ITS       | CALBF: 5' – TTTATCAACTTGTCACACCAGA – 3'      | 273 <sup>[75]</sup>     | 72                         |
|                        |           | CALBR: 5' – ATCCCGCCTTACCACTACCG – 3'        |                         |                            |
| <i>C. glabrata</i>     | ITS       | ITS1F: 5' – CACGACTCGACACTTTCTAATT – 3'      | 402 <sup>[77]</sup>     | 45-55                      |
|                        |           | ITS4R: 5' – TCCTCCGCTTATTGATATGC – 3'        |                         |                            |
|                        |           | CGLF: 5' – TTGTCTGAGCTCGGAGAGAG – 3'         | 929/839 <sup>[78]</sup> | 55                         |
|                        |           | UNI2R: 5' – TTCTTTTCCTCCGCTTATTG – 3'        |                         |                            |
|                        | MP65 gene | GLA8F: 5' – GATGTTGTCACTAAGACTGTTCA – 3'     | 361 <sup>[57]</sup>     | 60                         |
|                        |           | GLA8R: 5' – AGTAGGAAGACAACCTGGCAAGG – 3'     |                         |                            |
|                        |           | CGLF: 5' – TTATCACACGACTCGACACT – 3'         | 423 <sup>[75]</sup>     | 72                         |
|                        |           | CGLR: 5' – CCCACATACTGATATGGCCTACAA – 3'     |                         |                            |
|                        | ITS       | ITS2F: 5' – AAGAATTTAACGTGGAACTTA – 3'       | 149 <sup>[77]</sup>     | 45-55                      |
|                        |           | ITS4R: 5' – TCCTCCGCTTATTGATATGC – 3'        |                         |                            |
| <i>C. tropicalis</i>   | ITS       | CTRF: 5' – GATTTGCTTAATTGCCCCAC – 3'         | 583/507 <sup>[78]</sup> | 55                         |
|                        |           | UNI2R: 5' – TTCTTTTCCTCCGCTTATTG – 3'        |                         |                            |
|                        |           | CTRF: 5' – CAATCCTACCGCCAGAGGTTAT – 3'       | 357 <sup>[75]</sup>     | 72                         |
|                        |           | CTRR: 5' – TGGCCACTAGCAAAATAAGCGT – 3'       |                         |                            |
|                        | MP65 gene | TRPF: 5' – TTCTGTTGCCAACACC – 3'             | 257 <sup>[57]</sup>     | 60                         |
|                        |           | TRPR: 5' – TGCTGTAACCGGACAAA – 3'            |                         |                            |
| <i>C. parapsilosis</i> | ITS       | ITS2F: 5' – GGCGGAGTATAAACTAATGGATAG – 3'    | 126 <sup>[77]</sup>     | 45-55                      |
|                        |           | ITS4R: 5' – TCCTCCGCTTATTGATATGC – 3'        |                         |                            |
|                        |           | CPLF: 5' – GTCAACCGATTATTTAATAG – 3'         | 570/370 <sup>[78]</sup> | 55                         |
|                        |           | UNI2R: 5' – TTCTTTTCCTCCGCTTATTG – 3'        |                         |                            |
|                        | MP65 gene | CPAF: 5' – GCCAGAGATTAACTCAACCAA – 3'        | 320/300 <sup>[75]</sup> | 72                         |
|                        |           |                                              |                         |                            |

|                         |      |                                                                                       |                         |    |
|-------------------------|------|---------------------------------------------------------------------------------------|-------------------------|----|
|                         |      | CPAR: 5' – CCTATCCATTAGTTTATACTCCGC –<br>3'                                           |                         |    |
|                         | MP65 | PAR15F: 5' – CTTCCGAAGCTAGCCAAGT – 3'<br>PAR15R: 5' – GAGGATGAAGTGGAGTCG – 3'         | 124 <sup>[57]</sup>     | 60 |
| <i>C. krusei</i>        | ITS  | CKRF: 5' – CTGGCCGAGCGAACTAGACT – 3'<br>UNI2R: 5' – TTCTTTTCCTCCGCTTATTG – 3'         | 590/169 <sup>[78]</sup> | 55 |
| <i>C. guiliermondii</i> | ITS  | CGLF: 5' – TTGGCCTAGAGATAGGTTGG – 3'<br>UNI2R: 5' – TTCTTTTCCTCCGCTTATTG – 3'         | 668/512 <sup>[78]</sup> | 55 |
|                         | MP65 | GUILL10F: 5' – CACCGTGGCTCTTGTTGCT – 3'<br>GUILL10R: 5' – AGACTTGGCAGTGGAAACG –<br>3' | 640 <sup>[57]</sup>     | 60 |
| <i>C. lusitaniae</i>    | ITS  | CLSF: 5' – TTCGGAGCAACGCCTAACCG – 3'<br>UNI2R: 5' – TTCTTTTCCTCCGCTTATTG – 3'         | 433/329 <sup>[78]</sup> | 55 |
| <i>C. dubliniensis</i>  | ITS  | CDBF: 5' – CTCAAACCCCTAGGGTTTGG – 3'<br>UNI2R: 5' – TTCTTTTCCTCCGCTTATTG – 3'         | 591/217 <sup>[78]</sup> | 55 |
|                         |      | CDU F: 5' – AACTTGTCACGAGATTATTTT – 3'<br>CDU R: 5' – AAAGTTTGAAGAATAAAATGGC –<br>3'  | 300 <sup>[166]</sup>    | 55 |

**Table S2** - List of primers used for Nested PCR. *Candida albicans* A9, *C. dubliniensis* 16F, *C. tropicalis* pk233, *C. tropicalis* NUM5076, *C. parapsilosis* IFO1068, *C. tropicalis* IF01396, *C. krusei* IFO0841, *C. kefyr* IFO0586, *C. guilliermondii* NUM4, *C. glabrata* ATCC2001, *C. lusitaniae* JCM05936 were used in this study. Kanbe (2002) reported that the nucleotide sequence of DNA topoisomerase II gene of *C. tropicalis* pk233 differs from that of *C. tropicalis* IFO1400, and that the nucleotide sequence of DNA topoisomerase II gene of *C. parapsilosis* IFO1068 differs from that of *C. parapsilosis* IFO1396. Therefore, *C. tropicalis* pk233, *C. tropicalis* NUM5076, *C. parapsilosis* IFO1068 and *C. parapsilosis* 1396 were referred to as *C. tropicalis* I, *C. tropicalis* II, *C. parapsilosis* I and *C. parapsilosis* II, respectively. Annealing temperature is 57°C [72].

| <b>Candida Spp.</b>       | <b>Specific primers</b>                                                                                                                        |
|---------------------------|------------------------------------------------------------------------------------------------------------------------------------------------|
| <i>C. albicans</i>        | CABF59F: 5' – TTGAACATCTCCAGTTTCAAAGGT – 3'<br>CABR110R: 5' – GTTGGCGTTGGCAATAGCTCTG – 3'<br>CADBR125R: 5' – AGCTAAATTCATAGCAGAAAGC – 3'       |
| <i>C. dubliniensis</i>    | CDBF28F: 5' – AAATGGGTTTGGTGCCAAATTA – 3'<br>CDBR110R: 5' – GTTGGCATTGGCAATAGCTCTA – 3'<br>CADBR125R: 5' – AGCTAAATTCATAGCAGAAAGC – 3'         |
| <i>C. tropicalis I</i>    | CTPIF36F: 5' – GTTGTACAAGCAGACATGGACTG – 3'<br>CTPIR68R: 5' – CAAGGTGCCGTCTTCGGCTAAT – 3'<br>CTPIR121R: 5' – TCAAGGTACAGTTATGGCCAAGTT – 3'     |
| <i>C. tropicalis II</i>   | CTPIIF36F: 5' – CTGGGAAATTATATAAGCAAGTT – 3'<br>CTPIIR60R: 5' – CTTGAGATACTCAATCTTTTATC – 3'<br>CTPIIR121R: 5' – TCAATGTACAATTATGACCGAGTT – 3' |
| <i>C. parapsilosis I</i>  | CPPIF41F: 5' – TGACAATATGACAAAGGTTGGTA – 3'<br>CPPIR61R: 5' – ACTTTTAAACTGTTAACCGA – 3'<br>CPPIR122R: 5' – TGTCAAGATCAACGTACATTTAGT – 3'       |
| <i>C. parapsilosis II</i> | CPPIIF41F: 5' – GGACAACATGACAAAAGTCGGCA – 3'<br>CPPIIR69R: 5' – TTGTGGTGTAATCTTGGGAG – 3'<br>CPPIIR122R: 5' – GGTAAGGATCAAAGTGCACTTTA – 3'     |
| <i>C. krusei</i>          | CKSF35F: 5' – GAGCCACGGTAAAGAATACACA – 3'<br>CKSR57R: 5' – TTAAAGTGACCCGGATACC – 3'<br>CKSR110R: 5' – TTTCTCTGGCAATTCCAATCG – 3'               |
| <i>C. kefyr</i>           | CKFF35F: 5' – CTTCCAAAGGTCAGAAGTATGTCC – 3'<br>CKFR85R: 5' – CTTCAAACGGTCTGAAACCT – 3'<br>CKFR104R: 5' – CACGAAATCGTTAGGAACTTCAC – 3'          |
| <i>C. glabrata</i>        | CGBF35F: 5' – CCCAAAAATGGCCGTAAGTATG – 3'<br>CGBR103R: 5' – ATAGTCGCTACTAATATCACACC – 3'<br>CGBR77R: 5' – CTGCTTGAAAGAAATATCGGAGAC – 3'        |
| <i>C. guilliermondii</i>  | CGLF41F: 5' – CCCAAAATCACAAGCTCAAGT – 3'<br>CGLR61R: 5' – TACGACTTGAAGTTGCGAATTG – 3'<br>CGLR103R: 5' – GATGACAATTTTCTCCAGAGGC – 3'            |
| <i>C. lusitaniae</i>      | CLTF39F: 5' – CATGTCGAAATGCAACCCCCCG – 3'<br>CLTR119R: 5' – GCGTACACTTGTGGCCATCTTTA – 3'<br>CLTR125R: 5' – TCATTACCTACGACTTTGAG – 3'           |

**Table S3** - Restriction Fragment Length Polymorphism (RFLP) fragment patterns in oral *Candida* spp. isolates with restriction enzymes. [9,83].

| Primer sequence         | ITS1 - (5' – TCCGTAGGTGAACCTGCGG – 3')  |                           |                         |                              |                          |
|-------------------------|-----------------------------------------|---------------------------|-------------------------|------------------------------|--------------------------|
|                         | ITS4 - (5' – TCCTCCGCTTATTGATATGC – 3') |                           |                         |                              |                          |
| Fragment sizes (bp)     |                                         |                           |                         |                              |                          |
| <i>Candida</i> spp.     | ITS1-ITS4                               | <i>MspI</i>               | <i>BfaI</i>             | <i>HaeIII</i>                | <i>DdeI</i>              |
| <i>C. albicans</i>      | 535                                     | 238-297 <sup>[9]</sup>    | -                       | 90, 430 <sup>[83]</sup>      | 100, 420 <sup>[83]</sup> |
| <i>C. parapsilosis</i>  | 520                                     | 520 <sup>[9]</sup>        | -                       | 40, 110, 390 <sup>[83]</sup> | -                        |
| <i>C. tropicalis</i>    | 524                                     | 184-340 <sup>[9]</sup>    | -                       |                              | -                        |
| <i>C. krusei</i>        | 510                                     | 249-261 <sup>[9]</sup>    | 120-200 <sup>[83]</sup> | 40, 90, 380 <sup>[83]</sup>  | -                        |
| <i>C. guiliermondii</i> | 608                                     | 82-155-371 <sup>[9]</sup> | -                       |                              | -                        |
| <i>C. glabrata</i>      | 871                                     | 314-577 <sup>[9]</sup>    | -                       | 200, 650 <sup>[83]</sup>     | -                        |
| <i>C. lusitaniae</i>    | 383                                     | 117-266 <sup>[9]</sup>    | -                       |                              | -                        |
| <i>C. kefyr</i>         | 721                                     | 721 <sup>[9]</sup>        | -                       |                              | -                        |

**Table S4** - Oligonucleotide probes used in for *Candida* spp. in non-oral isolates [89].

| Species                      | Oligonucleotide probe sequence<br>(Annealing temperature for the following is 55°C)                |
|------------------------------|----------------------------------------------------------------------------------------------------|
| Positive Control             | 5' – GCATATCAATAAGCGGAGGA-3'                                                                       |
| Negative Control             |                                                                                                    |
| Universal fungal probe (ITS) | 5' – TTGACCTCRRATCAGGTAGGRATACCCGCTGAACTTAA-3'                                                     |
| <i>C. albicans</i>           | 5' –<br>ATTGCTTGCGGCGGTAGCGTCTACCACGTATATCTTCAAAAACGCTTA<br>TTTTGCTAGTGGCCACCACAATTTATTTTCATA – 3' |
| <i>C. tropicalis</i>         | 5' – AACGCTTATTTTGCTAGTGGCCACCACAATTTATTTTCATA – 3'                                                |
| <i>C. parapsilosis</i>       | 5' – TTCCACTCATTGGTACAAACTCCAAACTTCTTCCAAA – 3'                                                    |
| <i>C. krusei</i>             | 5' – GACGCTTGCGGCCGAGAGCGAGTGTTGCGAGACAACAAA – 3'                                                  |
| <i>C. glabrata</i>           | 5' – TAGGTTTACCAACTCGGTGTTGATCTAGGGAGGGATAAGT – 3'                                                 |

**Table S5** - Primers used in Kasahara for the detection of *Candida* spp. with LAMP. Primers have ITS2 as the target region [109].

| Species                         | Primer name | Sequence                                                         |
|---------------------------------|-------------|------------------------------------------------------------------|
| <i>C. albicans</i>              | F3          | 5' – TCTGGTATTCCGGAGGGC – 3'                                     |
|                                 | B3          | 5' – AGTCCTACCTGATTTGAGGT – 3'                                   |
|                                 | FIP         | 5' – CTACCGTCTTTCAAGCAAACCCATGAGCGTCGTTTCTCCCT – 3'              |
|                                 | BIP         | 5' –<br>TTGACAATGGCTTAGGTCTAACCAAAAGATATACGTGGTGGACGTTAC<br>– 3' |
|                                 | LB          | 5' – CTCAACACCAAACCCAGCGG – 3'                                   |
| <i>C. glabrata</i>              | F3          | 5' – TGGTAGTGAGTGATACTCGTT – 3'                                  |
|                                 | B3          | 5' – CTTAAAGACGTCTGTCTGCC – 3'                                   |
|                                 | FIP         | 5' –<br>GCAGATTAATAGAGAAGCTTGCGCTGAGTTAACTTGAAATTGTAGGCC<br>– 3' |
|                                 | BIP         | 5' – GCGGCGGGGGTTAATACTGTCACAAAACACTCACTTATCCCT – 3'             |
|                                 | LF          | 5' – GGTTTTACCAACTCGGTGTTGATCT – 3'                              |
| <i>C. parapsilosis</i><br>group | F3          | 5' – CGCCCTTTGGTATTCCAA – 3'                                     |
|                                 | B3          | 5' – CCTCCGCTTATTGATATGCT – 3'                                   |
|                                 | FIP         | 5' – CAAGCAAACCCAGCGTATCGAGCGTCATTTCTCCCTCA – 3'                 |
|                                 | BIP         | 5' – TTCCACTCATTGGTACAACTCCAAGTTCAGCGGGTAGTCC – 3'               |
|                                 | LF          | 5' – CAACACCAAACCCGAGGGT – 3'                                    |
| <i>C. tropicalis</i>            | LB          | 5' – CTTCCAAATTCGACCTCAAATCAGG – 3'                              |
|                                 | F3          | 5' – TTTGGTATTCCAAAGGGC – 3'                                     |
|                                 | B3          | 5' – AGTCCTACCTGATTTGAGGT – 3'                                   |
|                                 | FIP         | 5' – CCTAGCGTATTGCTCAACACCAAATGCCTGTTTGAGCGTCA – 3'              |
|                                 | BIP         | 5' – ACGTGGAACCTTATTTTAAGCGACTATAAATTGTGGTGGCCACTAG<br>– 3'      |
|                                 | LF          | 5' – CCGGGGGTTTGAGGGAGAAA – 3'                                   |
